# Supplementary material
Source: PubMed Central journal article supplement (PMC4856603)
Supplement: SD4.pdf [file SD4.pdf]

**A**

**HCoV-NL63  
Spike gene -  
(S1 domain)  
1383nt**

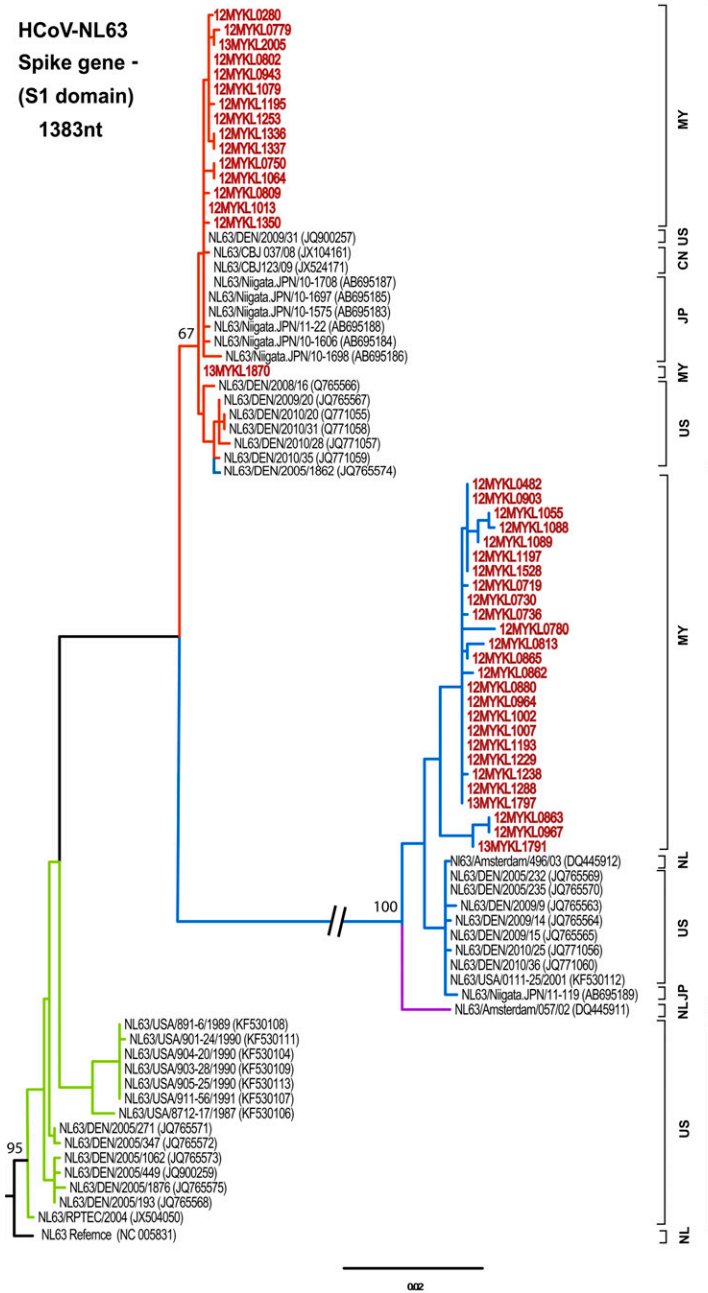**B**

**HCoV-NL63  
Nucleocapsid gene  
1133nt**

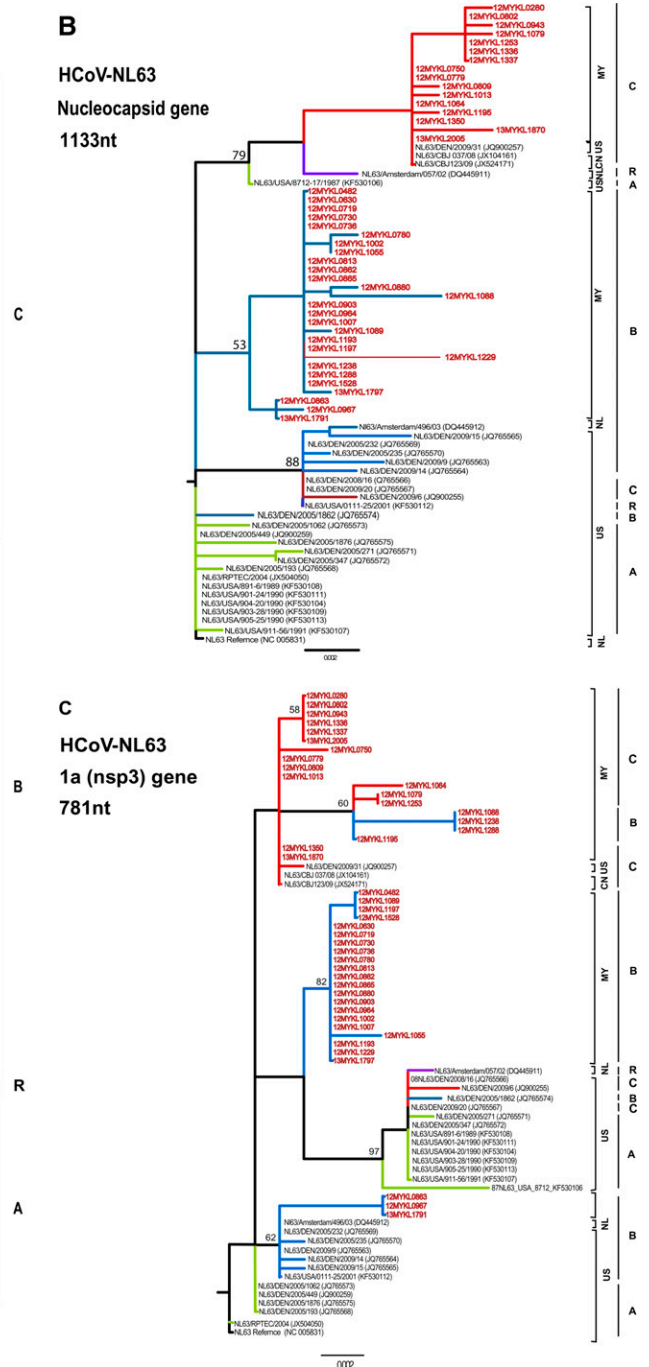**C**

**HCoV-NL63  
1a (nsp3) gene  
781nt**

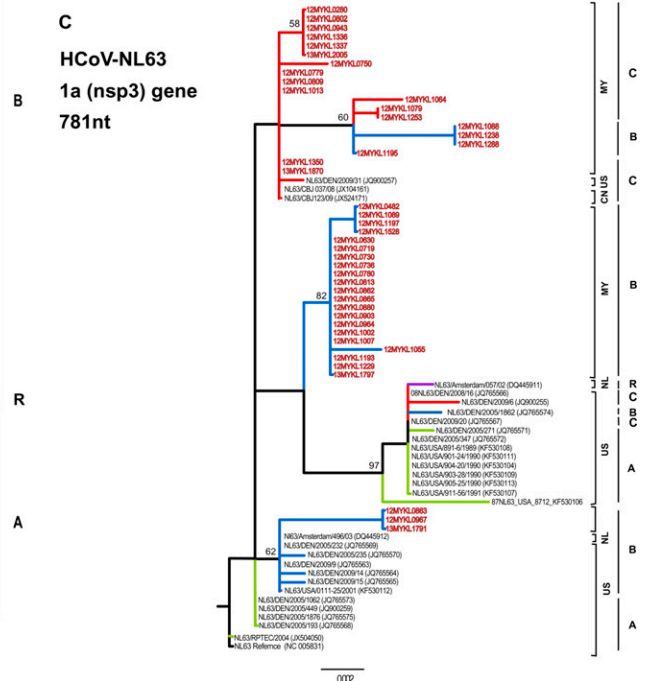

SUPPLEMENTAL FIGURE 1. Phylogenetic analysis of the HCoV-NL63 spike, nucleocapsid, and *1a* genes. The partial spike (S1) (1,383 nucleotides), complete nucleocapsid (1,133 nucleotides), and partial *1a* (nsp3) (781 nucleotides) maximum likelihood trees were constructed using the Hasegawa–Kishino–Yano nucleotide substitution model and gamma distribution plus discrete gamma categories in phylogenetic analysis using parsimony. The HCoV-NL63 strains obtained from this study were color coded and the HCoV-NL63 genotypes A–C were indicated; green = genotype A, blue = genotype B, and red = genotype C. The recombinant genotype is indicated by purple color. Scale bars indicating genetic distance (in nucleotide substitutions per site) are shown. Each HCoV-NL63 sequence was assigned to its genotype based on the S1 phylogenetic analysis. Country codes are as follows; MY = Malaysia; US = United States; JP = Japan; NL = Netherlands; CN = China.

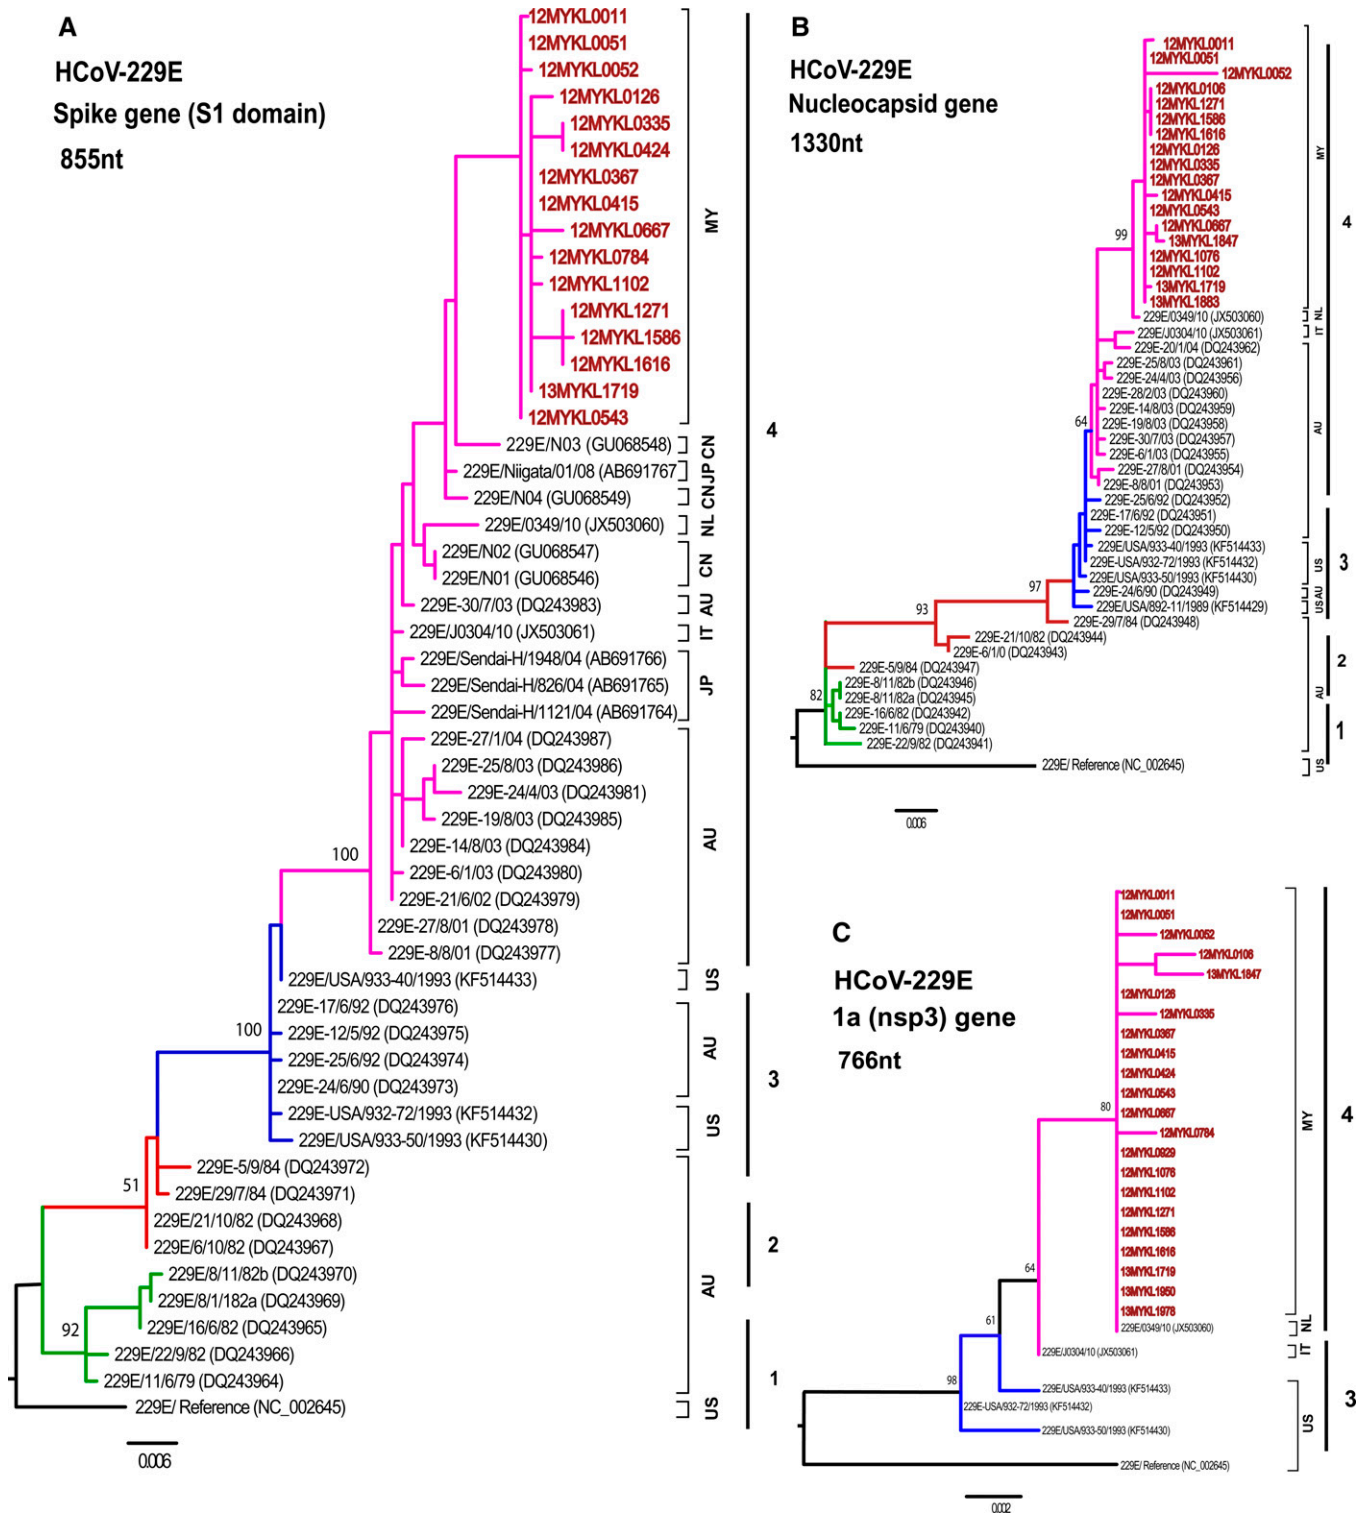

SUPPLEMENTAL FIGURE 2. Phylogenetic analysis of the HCoV-229E spike, nucleocapsid, and 1a genes. The partial spike (S1) (855 nucleotides), complete nucleocapsid (1,330 nucleotides), and partial 1a (nsp3) (766 nucleotides) maximum-likelihood trees were constructed using the Hasegawa–Kishino–Yano nucleotide substitution model and gamma distribution plus discrete gamma categories in phylogenetic analysis using parsimony. The HCoV-229E strains obtained from this study were color coded and the HCoV-229E groups 1–4 were indicated; green = genotype 1, red = genotype 2, blue = genotype 3, and purple = genotype 4. Scale bars indicating genetic distance (in nucleotide substitutions per site) are shown. Each HCoV-229E sequence was assigned to its genotype based on the S1 phylogenetic analysis. Country codes are as follows; MY = Malaysia; US = United States; JP = Japan; NL = Netherlands; CN = China; AU = Australia; IT = Italy.

SUPPLEMENTAL TABLE 1

## Evolutionary characteristics of HCoV-NL63 and HCoV-229E genotypes

| Subtype-gene evolutionary rate*                                | Genotype      | tMRCA†                    |
|----------------------------------------------------------------|---------------|---------------------------|
| NL63-Spike $4.3 \times 10^{-4}$ ( $2.1 - 6.6 \times 10^{-4}$ ) | All genotypes | 1,902.2 (1,805.4–1,974.4) |
|                                                                | Genotype A    | 1,973.9 (1,961.2–1,983.8) |
|                                                                | Genotype B    | 1,995.6 (1,989.7–2,000.2) |
|                                                                | Genotype C    | 2,003.0 (1,998.6–2,006.5) |
| 229E-Spike $3.9 \times 10^{-4}$ ( $1.3 - 6.5 \times 10^{-4}$ ) | All groups    | 1,956.8 (1,948.4–1,962.0) |
|                                                                | Group 1       | 1,976.6 (1,973.7–1,978.9) |
|                                                                | Group 2       | 1,981.1 (1,979.6–1,982.0) |
|                                                                | Group 3       | 1,989.0 (1,987.4–1,990.0) |
|                                                                | Group 4       | 1,996.3 (1,993.0–1,999.0) |

\*Estimated mean rates of evolution expressed as  $10^{-4}$  nucleotide substitutions/site/year under a relaxed molecular clock with GTR+I substitution model and an exponential tree model. The 95% highest posterior density (HPD) confidence intervals are included in parentheses.

†Mean time of the most common ancestor (tMRCA, in calendar year). The 95% highest posterior density confidence intervals are indicated.

SUPPLEMENTAL TABLE 2

## Comparison of upper respiratory tract infection symptoms severities between patients infected with HCoV-NL63 and HCoV-229E

| Symptom             | Severity level | HCoV-NL63 | HCoV-229E | <i>P</i> value* |
|---------------------|----------------|-----------|-----------|-----------------|
| Sneezing            | None           | 3         | 3         | 0.472           |
|                     | Moderate       | 35        | 15        |                 |
|                     | Severe         | 7         | 5         |                 |
| Nasal discharge     | None           | 7         | 4         | 0.051           |
|                     | Moderate       | 33        | 11        |                 |
|                     | Severe         | 5         | 8         |                 |
| Nasal congestion    | None           | 16        | 8         | 0.727           |
|                     | Moderate       | 24        | 11        |                 |
|                     | Severe         | 5         | 4         |                 |
| Headache            | None           | 22        | 10        | 0.696           |
|                     | Moderate       | 17        | 8         |                 |
|                     | Severe         | 6         | 5         |                 |
| Sore throat         | None           | 12        | 9         | 0.269           |
|                     | Moderate       | 26        | 9         |                 |
|                     | Severe         | 6         | 5         |                 |
| Hoarseness of voice | None           | 10        | 8         | 0.172           |
|                     | Moderate       | 34        | 13        |                 |
|                     | Severe         | 1         | 2         |                 |
| Muscle ache         | None           | 17        | 7         | 0.252           |
|                     | Moderate       | 20        | 15        |                 |
|                     | Severe         | 7         | 1         |                 |
| Cough               | None           | 2         | 3         | 0.477           |
|                     | Moderate       | 32        | 15        |                 |
|                     | Severe         | 11        | 5         |                 |

\**P* values < 0.05 represent significant results.
